1 **Dynamic expressions of confidence within an evidence**  
2 **accumulation framework**

3

4

**Kobe Desender<sup>1,2</sup>, Tobias H. Donner<sup>1</sup>, & Tom Verguts<sup>2</sup>**

5

**1. Section Computational Cognitive Neuroscience, Department of Neurophysiology and  
6 Pathophysiology, University Medical Center Hamburg-Eppendorf, Germany**

7

**2. Department of Experimental Psychology, Ghent University, Belgium**

8

9

10

**Corresponding author:**

11

Dr. Kobe Desender

12

Department of Neurophysiology and Pathophysiology

13

University Medical Center Hamburg-Eppendorf

14

Martinistraße 52, 20251 Hamburg

15

Germany

16

E-mail: [Kobe.Desender@gmail.com](mailto:Kobe.Desender@gmail.com)

17

18

**Short title:** Dynamic expressions of confidence

19

## Abstract

20 Human observers can reliably report their confidence in the choices they make. An  
21 influential framework conceptualizes decision confidence as the probability of a decision  
22 being correct, given the choice made and the evidence on which it was based. This  
23 framework accounts for three diagnostic signatures of human confidence reports, including  
24 an opposite dependence of confidence on evidence strength for correct and error trials.  
25 However, the framework does not account for the temporal evolution of these signatures,  
26 because it only describes the transformation of a static evidence representation into choice  
27 and the associated confidence. Here, we combine this framework with another influential  
28 framework: the temporal accumulation of evidence towards decision bounds. We propose  
29 that confidence at any point in time reflects the probability of being correct, given the choice  
30 and accumulated evidence *up until that point*. This model predicts a systematic time-  
31 dependence of all diagnostic signatures of decision confidence, most critically: an increase of  
32 the opposite dependence of confidence on evidence strength and choice correctness with  
33 time. We tested, and confirmed, these predictions in human subjects performing a random  
34 dot motion discrimination task, in which confidence judgments were queried at different  
35 points in time. We conclude that confidence reports track the temporal evolution of the  
36 probability of being correct.

37

## Author summary

38 Humans are able to report a sense of confidence in the accuracy of a choice. An  
39 influential framework states that confidence reflects the probability that a choice is correct.  
40 We combined human experimenting with computational modelling and extended this notion  
41 in the time domain, thus to formally describe the dynamics of confidence. Both human data  
42 and our model show that the sense of confidence depends on the point in time, at which it is  
43 queried. We conclude that human confidence reports reflect the dynamics of the probability  
44 of a choice being correct.

## 45 Introduction

46 Human observers can reliably judge the confidence about their choices. They often  
47 report high confidence for correct choices and low confidence for errors. Accurate internal  
48 representations of confidence are useful for the adaptive control of future behaviour<sup>1-3</sup>. An  
49 influential framework posits that internal representations of decision confidence, and agents'  
50 overt reports thereof, reflect the probability of being correct, given the choice made and given  
51 the evidence on which it was based<sup>4-6</sup>. In this framework, both choice and confidence are  
52 directly based on the same underlying computations. One advantage of this approach is that  
53 it predicts three qualitative signatures of confidence<sup>5</sup>: (i) an interaction between evidence  
54 strength and choice accuracy, whereby confidence increases with evidence strength for  
55 correct choices, but decreases for incorrect choices; (ii): confidence predicts a monotonic  
56 increase in accuracy; (iii): a steeper psychometric performance for high versus low  
57 confidence trials. These three signatures have been observed in neural data<sup>5</sup>, several  
58 implicit behavioural measures of confidence<sup>4,5,7,8</sup>, and explicit confidence reports of human  
59 observers<sup>4,9</sup>. While this framework is highly influential, an important limitation is that it is  
60 static: a fixed quantity of evidence determines both the choice and associated confidence.  
61 Therefore, this framework does not account for the dynamics of decision-making, the  
62 associated trade-off between speed and accuracy, and their effect on confidence reports.

63 Another influential framework, bounded accumulation, holds that perceptual decisions  
64 are based on the temporal accumulation of noisy sensory evidence towards decision bounds  
65<sup>10,11</sup>. In two-choice tasks, a decision maker accumulates evidence for each option, and the  
66 option for which the integrated evidence first crosses a decision threshold is selected,  
67 indicating commitment to choice<sup>11</sup>. The efficiency (i.e., signal-to-noise ratio) of the  
68 accumulation process is governed by the so-called drift rate.

69 Here, we extend the framework of statistical confidence into the time domain, by  
70 connecting it to the framework of evidence accumulation towards decision bounds, and show

71 that this dynamic framework of statistical decision confidence accounts well for human  
72 behavior in a classic perceptual choice task widely used in the study of decision-making.

73

## 74 **Results**

### 75 **Dynamic statistical decision confidence**

76 We propose that confidence at any point in time reflects the probability of being  
77 correct, given the choice made and the evidence accumulated *up until that point*. We first  
78 unpack and solidify this idea through simulations of the drift diffusion model (DDM), a popular  
79 evidence accumulation model (Fig. 1A). The key insight, supported by recent data, is that the  
80 evidence accumulation does not necessarily terminate at the time of bound crossing:  
81 evidence can continue to accumulate following the response<sup>12,13</sup>. Therefore, confidence  
82 reports may differ, depending on whether they are probed around the time of the response  
83<sup>14,15</sup> or only later in time, after additional post-decision processing<sup>16-18</sup>. Even so, in both  
84 cases, confidence reflects the probability of being correct, given the choice and accumulated  
85 evidence up until that point. The heat map in Fig. 1A reflects the probability of being correct  
86 given evidence (Y-axis) and time (X-axis), conditional on the choice made. Note that the heat  
87 map is flipped vertically when the lower boundary is reached instead. Thus, confidence in our  
88 model reflects the probability of being correct, given choice, evidence and time. Most  
89 importantly, with respect to Signature 1 (an interaction between evidence strength and  
90 choice accuracy), our model simulations show that confidence increases for both corrects  
91 and errors when confidence is quantified at the time the bound is reached (Figure 1B),  
92 whereas the interaction between evidence strength and choice accuracy emerges when  
93 confidence is queried later in time (Figure 1C-D).

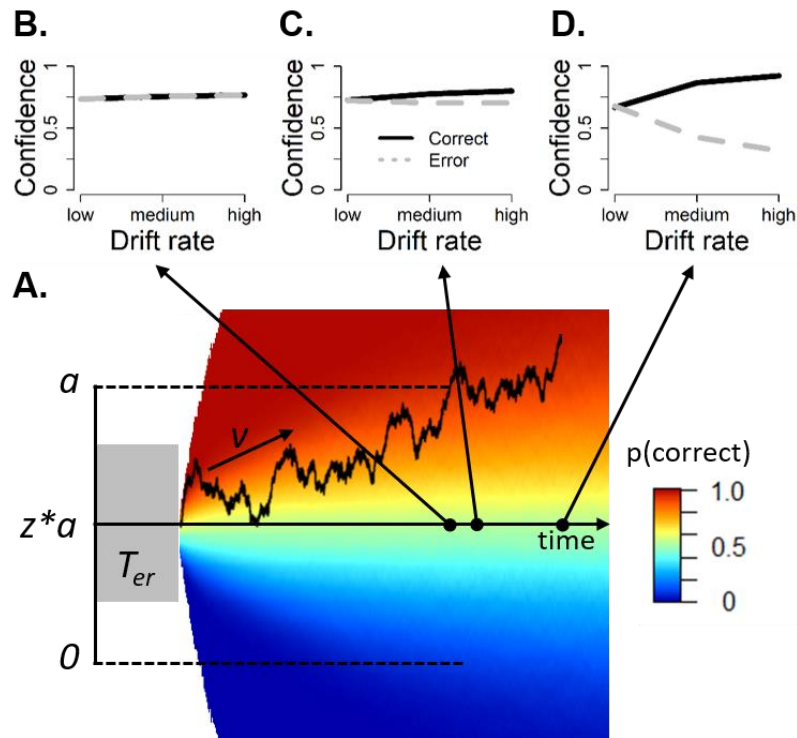

94

95 **Figure 1. Quantifying decision confidence within an evidence accumulation framework. A.**  
96 *Noisy sensory evidence is accumulated over time, until the decision variable reaches one of two*  
97 *bounds ( $a$  or  $0$ ), corresponding to a left or right choice, respectively. After the decision variable*  
98 *reaches a bound, evidence continues to accumulate. The heat map shows the probability of being*  
99 *correct given time and evidence, conditional on the (left) choice made. Confidence is quantified as the*  
100 *probability of the choice being correct, given elapsed time and the integrated evidence (i.e.,*  
101 *represented by the color of the heat map). Confidence can be queried at different points in time. B-D.*  
102 *Model predictions about signature 1, an interaction between evidence strength and accuracy,*  
103 *depending on when in time confidence is quantified.*

104

105 We next tested the model predictions in the behavior of human participants during the  
106 widely used random dot motion discrimination task, in which we prompted confidence ratings  
107 at different latencies. We first show that behavioral performance was well explained by the  
108 drift diffusion model. Second, we tested and confirmed dynamic predictions about these  
109 three diagnostic statistical signatures of confidence. Third, using a manipulation of evidence  
110 volatility, we shed light on the stopping rule used for post-decisional processing.

111

## 112 **Explaining behavior through bounded evidence accumulation**

113           Twenty-six human participants viewed random dot motion stimuli and decided as fast  
114 and accurately as possible whether a subset of dots was coherently moving towards the left  
115 or the right side of the screen <sup>10</sup>. The difficulty of these decisions was manipulated by varying  
116 the proportion of coherently moving dots. Five different levels of coherence were used,  
117 ranging from 0 up to .4, all of which were randomly intermixed within a block. We also  
118 manipulated the volatility of motion coherence over the course of a single trial. Specifically,  
119 on each frame, the input coherence was either sampled from a Gaussian distribution with  $SD$   
120 = 0 (low volatility), or from a Gaussian distribution with  $SD = .256$  (high volatility) around the  
121 generative coherence. In the high volatility condition, additional noise is thus introduced in  
122 the decision process, which previous work has shown to speed up RTs and increase  
123 confidence <sup>14</sup>. Depending on the block that participants were in, responses were collected in  
124 a different way (see Figure 2). In the *immediate condition* participants jointly indicated their  
125 choice (left or right) and their level of confidence (guess correct, probably correct or certainly  
126 correct) via a single response. In the *delayed condition*, participants first indicated their  
127 choice (left or right), and then after a 1s blank screen or 1s of continued motion (same  
128 coherence, volatility and motion direction as the initial stimulus) they indicated the level of  
129 confidence in their choice on a six-point scale.

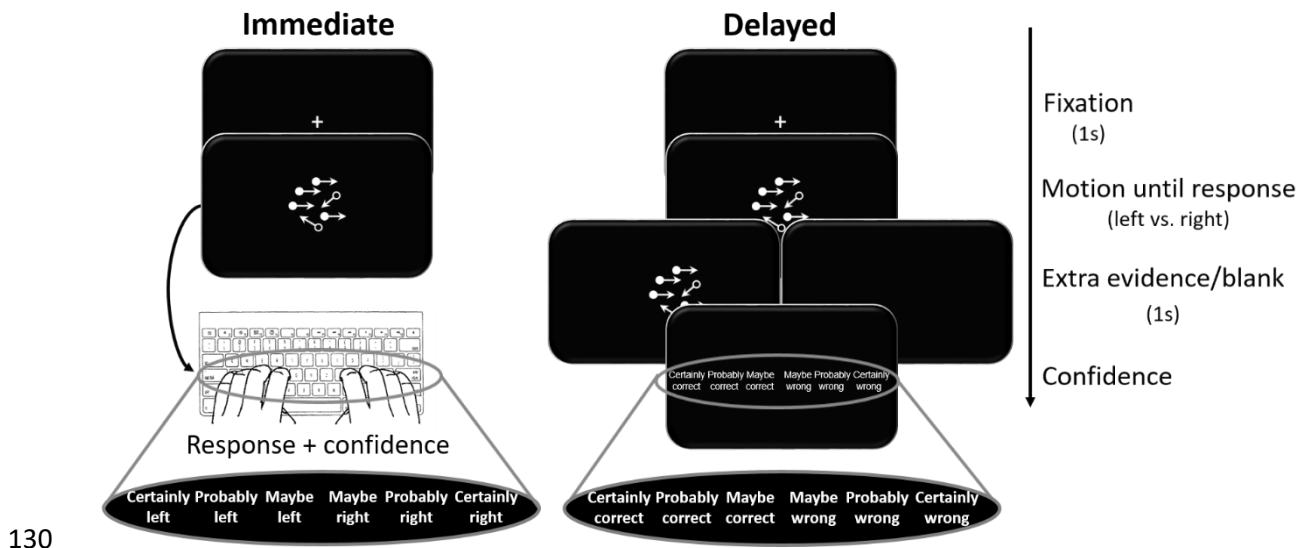

130

131 **Figure 2. Experimental task.** Sequence of events in the experimental task. Participants decided, as  
132 fast and accurately as possible, whether the majority of dots were moving left or right. In the  
133 immediate condition, they did so by jointly indicating their choice (left or right) and confidence (sure  
134 correct, probably correct or guess correct) in a single response. In the delayed condition, participants  
135 first indicated their choice with their thumbs (left or right), and after a 1s blank or 1s of continued  
136 motion, they were prompted to indicate the degree of confidence in their decision using a six-point  
137 confidence scale (ranging from certainly correct to certainly wrong).

138 To unravel how coherence and volatility affected latent cognitive variables in the  
139 decision process, we fitted choices and reaction times using a hierarchical version of the drift  
140 diffusion framework<sup>19</sup>. Because the effects of coherence and volatility were not modulated by  
141 the timing of confidence reports (immediate vs delayed) for both RTs,  $F < 1$ , Bayes Factor  
142 ( $BF$ ) = .008, and accuracy,  $F < 1$ ,  $BF$  = .01, the RT and accuracy data were combined. First,  
143 as typically observed in random dot motion tasks, drift rates increased monotonically with  
144 coherence level (see Figure 3A), with significant differences in drift rate between all  
145 coherence levels (averaged across volatility levels),  $p_s < .001$ . Estimated drift rates did not  
146 depend on the level of evidence volatility,  $p_s > .119$ . Second, as we predicted<sup>14</sup>, our  
147 manipulation of within-trial evidence volatility was captured by the within-trial drift variability  
148 parameter  $\sigma$  (see Figure 3B; Methods). When averaged over different coherences, estimated  
149 within-trial variability was higher for high compared to low volatility,  $p = .014$  (pair-wise

150 comparisons within each coherence value: 0% coherence:  $p = .091$ ; 5% coherence:  $p = .049$ ;  
151 10% coherence:  $p = .259$ ; 20% coherence:  $p = .106$ ; 40% coherence:  $p = .457$ ).

152 These model fits captured key qualitative patterns evident in the behavioral data  
153 (Figure 3C-D). Accuracy increased with the level of coherence (data:  $F(4,22) = 267.48$ ,  $p <$   
154  $.001$ ; model:  $F(4,22) = 619.57$ ,  $p < .001$ ), whereas evidence volatility and the interaction  
155 between both variables left accuracy unaffected (data:  $F_s < 1$ ; model:  $p_s > .213$ ). Reaction  
156 times decreased with increasing coherence levels (data:  $F(4,22) = 30.68$ ,  $p < .001$ ; model:  
157  $F(4,22) = 52.25$ ,  $p < .001$ ), and were shorter with high compared to low volatility (data:  
158  $F(1,25) = 9.10$ ,  $p = .006$ ; model:  $F(1,25) = 17.91$ ,  $p < .001$ ), an effect that was mostly  
159 pronounced at low coherence levels (data:  $F(4,22) = 13.21$ ,  $p < .001$ ; model:  $F(4,22) = 15.53$ ,  
160  $p < .001$ ).

161

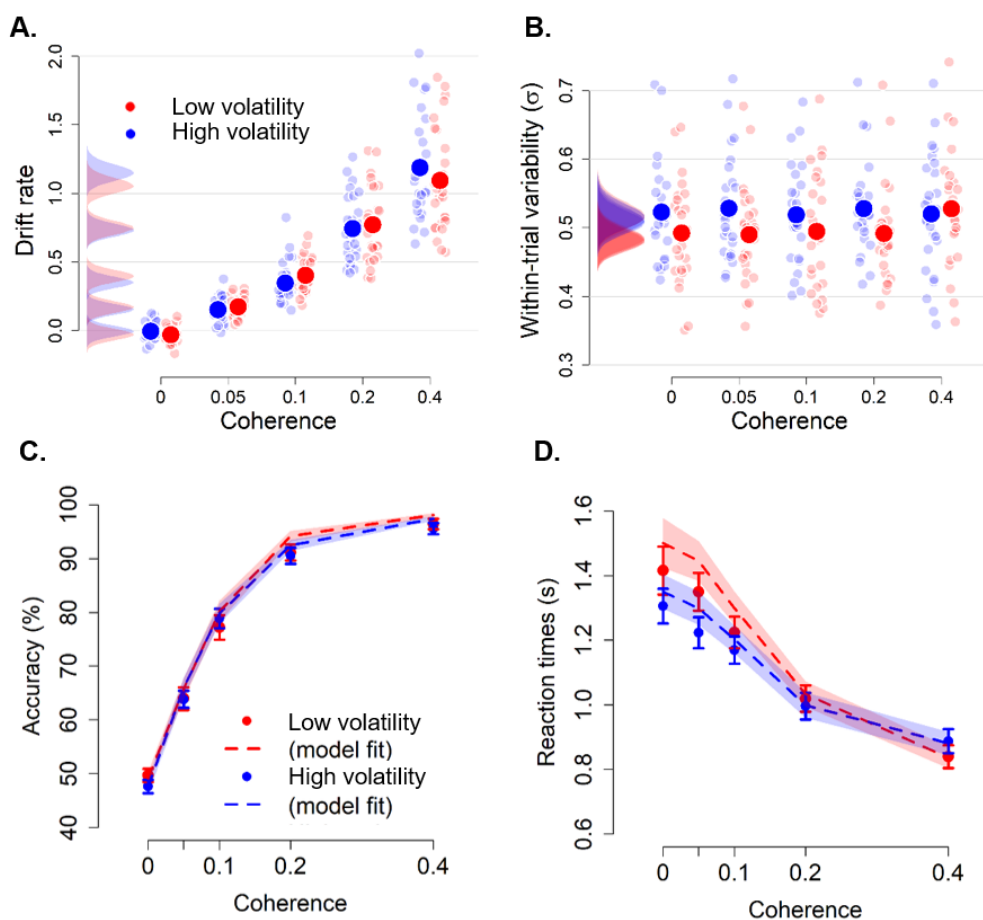

162



163 **Figure 3. Model fits and task performance. A.** Drift rate scales monotonically with the proportion of  
164 coherently moving dots, but did not differ for high and low volatility conditions. **B.** Within-trial variability  
165 ( $\sigma$ ) selectively varied as a function of evidence volatility, whereas it was unaffected by motion  
166 coherence. Large dots: group averages; small dots: individual participants. Distributions show the  
167 group posteriors. Statistical significance is reflected in overlap between posterior distributions over  
168 parameter estimates (Materials and Methods). **C-D.** Accuracy (C) and RTs (D) as a function of  
169 coherence and evidence volatility, separately for the empirical data (points and bars) and model fits  
170 (lines and shades). Shades and error bars reflect SEM of model and data, respectively.

171

### 172 **Post-decision accumulation explains dynamic signatures of statistical confidence**

173 Next, we used our model fits to obtain qualitative and quantitative predictions of  
174 confidence reports about the three dynamic signatures of confidence. In order to create a  
175 heat map reflecting the probability of being correct, we simulated a large number of trials and  
176 calculated average accuracy for each combination of time and evidence. Confidence  
177 predictions were quantified by reading out the values from this heat map (reflecting the  
178 probability of being correct) for each combination of evidence, time, and choice.

179 *Signature 1: interaction between evidence strength and choice accuracy.* The first  
180 diagnostic signature of statistical confidence established previously<sup>5</sup> is an increase of  
181 confidence with evidence strength for correct trials, but a decrease for error trials. In the  
182 immediate condition, confidence increased with coherence level,  $F(4,44.81) = 15.62$ ,  $p <$   
183  $.001$ . Crucially, there was also the predicted interaction between coherence level and choice  
184 accuracy,  $F(4,1990.70) = 14.09$ ,  $p < .001$ . Confidence increased with evidence strength for  
185 correct trials (linear contrast:  $p < .001$ ), but there was no significant effect for error trials  
186 (linear contrast:  $p = .070$ ; see Figure 4A). In contrast, as visualized in Figure 1B, the model  
187 predicts that when confidence is quantified at the time when the decision boundary is  
188 reached, confidence scales with coherence,  $F(4,25) = 14.14$ ,  $p < .001$ , but there is no  
189 interaction between coherence and choice accuracy,  $F(4,125.02) = 1.03$ ,  $p = .39$ .

190           The above mismatch can easily be remedied by assuming that choice and confidence  
191 cannot be simultaneously computed, or accessed for report – for example due to the  
192 psychological ‘refractory period’<sup>20,21</sup>. Indeed, when confidence was calculated with a small  
193 temporal delay (100 ms, Figure 1C; see Methods), the model did predict the interaction  
194 between coherence and choice accuracy,  $F(4,200) = 84.05$ ,  $p < .001$ . As in the behavioral  
195 data, the model with the small temporal delay predicted increasing confidence with  
196 coherence for correct trials (linear contrast:  $p < .001$ ), but not for error trials (linear contrast:  $p$   
197 = .541; Figure 4A). In the remainder, we will continue with predictions from the model with  
198 temporal delay.

199           In both delayed conditions, confidence scaled with coherence level (blank condition:  
200  $F(4,51.8) = 5.49$ ,  $p < .001$ ; extra evidence condition:  $F(4,4571.1) = 4.75$ ,  $p < .001$ ). In both  
201 conditions, there was also an interaction between coherence and choice accuracy (blank  
202 condition:  $F(4,3625.6) = 53.38$ ,  $p < .001$ ; extra evidence condition:  $F(4,4568.7) = 71.45$ ,  $p <$   
203  $.001$ ). Within the correct trials, confidence increased with coherence levels (blank and extra  
204 evidence conditions, linear contrasts:  $p < .001$ . Instead, within the error trials, confidence  
205 decreased as a function of coherence (blank and extra evidence conditions, linear contrasts:  
206  $p = .001$ ). This interaction was captured by a model which terminated post-decision  
207 accumulation after a fixed amount of time (cf. Figure 1D; Materials and Methods). This model  
208 also showed the scaling of confidence with coherence ( $F(4,69.79) = 39.9$ ,  $p < .001$ ), as well  
209 as the interaction with choice accuracy ( $F(4,225) = 1634.3$ ,  $p < .001$ ). Similar to the human  
210 data, confidence increased with coherence for correct trials (linear contrast:  $p < .001$ ) and  
211 decreased for error trials (linear contrast:  $p < .001$ ; figure 4B). Finally, there was a three-way  
212 interaction between coherence, choice accuracy and interrogation condition (data:  
213  $F(8,13466.5) = 18.22$ ,  $p < .001$ , model:  $F(4,475) = 161.54$ ,  $p < .001$ ).

214

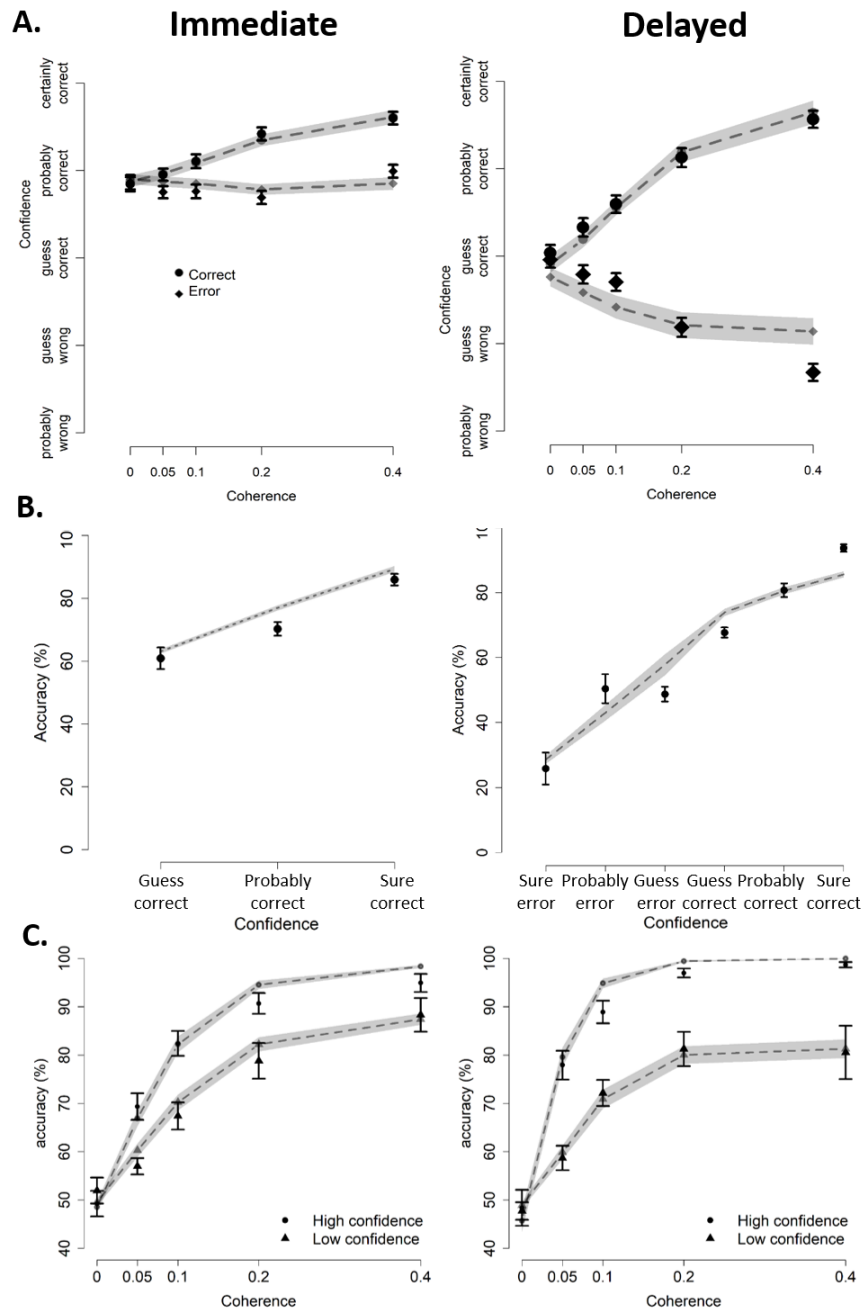

215

216 **Figure 4. Three dynamic signatures of statistical confidence. A. Signature 1: an interaction**  
 217 **between evidence strength and choice accuracy.** When confidence is quantified shortly after the  
 218 decision bound has been reached (“immediate”), both model and data show an interaction between  
 219 evidence strength and choice accuracy in the immediate condition. The same pattern was observed  
 220 for the delayed condition, although the interaction effect was clearly much stronger here. **B. Signature**  
 221 **2: monotonically increasing accuracy as a function of confidence.** Both model and data show a  
 222 monotonic scaling of accuracy depending on the level of confidence. **C. Signature 3: Steeper**  
 223 **psychometric performance for high versus low confidence.** Both model and data show a steeper

224 *psychometric performance for trials judged with high versus low confidence. Notes: data for the*  
225 *delayed conditions are averaged over blank and extra evidence conditions. All plots show empirical*  
226 *data (black points and bars) and model predictions (grey lines and shades). Shades and error bars*  
227 *reflect SEM of model and data, respectively.*

228

229 *Signature 2: Monotonically increasing accuracy as a function of confidence.* The  
230 second signature of statistical confidence is that it monotonically predicts choice accuracy.  
231 Indeed, an approximately linear relation between confidence and mean accuracy was  
232 observed in the data for both the immediate condition,  $b = .13$ ,  $t(29.92) = 12.82$ ,  $p < .001$ , the  
233 delayed blank,  $b = .12$ ,  $t(27.29) = 16.12$ ,  $p < .001$ , and the delayed extra evidence condition,  
234  $b = .13$ ,  $t(23.33) = 15.45$ ,  $p < .001$ . This pattern was also captured by the model in the  
235 immediate condition,  $b = .12$ ,  $t(26.4) = 11.76$ ,  $p < .001$ , and in the delayed condition,  $b = .12$ ,  
236  $t(26) = 25.05$ ,  $p < .001$  (see Figure 4B). Note that these slopes did not differ depending on  
237 the moment in time when confidence was queried (data:  $X^2 = 2.03$ ,  $p = .363$ ; model:  $X^2 =$   
238  $3.76$ ,  $p = .152$ ).

239 *Signature 3: Steeper psychometric performance for high versus low confidence.* The  
240 third signature of statistical confidence is that the relation between accuracy and evidence  
241 strength should be steeper for trials judged with high versus low confidence. The model  
242 predicts that this difference should be larger for the delayed compared to the immediate  
243 condition (Figure 4C). To test this prediction, confidence reports were divided into high or low  
244 using a split-median, separately per participant. As expected, the interaction between  
245 coherence and confidence in predicting accuracy was observed both in the immediate  
246 condition (data:  $X^2(4) = 30.9$ ,  $p < .001$ ; model:  $X^2(4) = 2212.4$ ,  $p < .001$ ), and in the delayed  
247 condition (data: delayed blank:  $X^2(4) = 84.15$ ,  $p < .001$ , extra evidence:  $X^2(4) = 56.64$ ,  $p <$   
248  $.001$ ; model:  $X^2(4) = 9018.7$ ,  $p < .001$ ; see Figure 4C). Finally, there was a significant three-  
249 way interaction between coherence, confidence and interrogation condition (data:  $X^2(8) =$   
250  $24.51$ ,  $p = .002$ ; model:  $X^2(4) = 228.90$ ,  $p < .001$ ).

251

252 **Evidence volatility dissociates time-based and evidence-based stopping criteria**

253         If decision confidence is ‘read out’ and reported after additional post-decision  
254 processing, a stopping rule has to be implemented that determines when confidence is  
255 evaluated. In the previous simulations, following previous research a so-called ‘time-based  
256 stopping rule’ was implemented <sup>16,17</sup>: confidence was extracted after a fixed latency following  
257 initial bound crossing. An alternative implementation, however, is that the stopping rule for  
258 confidence reports is also based on accumulated evidence, just like the stopping rule for the  
259 first-order decision process <sup>18</sup>. According to this ‘evidence-based stopping rule’, after  
260 reaching the initial choice threshold, agents impose a second threshold and a delayed  
261 confidence report is given when this second threshold is reached. Because the statistical  
262 signatures discussed before do not arbitrate between the two delayed confidence stopping  
263 criteria (see Supplementary Materials), we next turn towards our manipulation of evidence  
264 volatility. Previous work has shown that an evidence-based model can explain the volatility  
265 effect on confidence for immediate confidence judgments <sup>14</sup>. We reasoned that the same  
266 manipulation could be used to disentangle a time-based versus an evidence-based stopping  
267 rule for delayed confidence judgments.

268

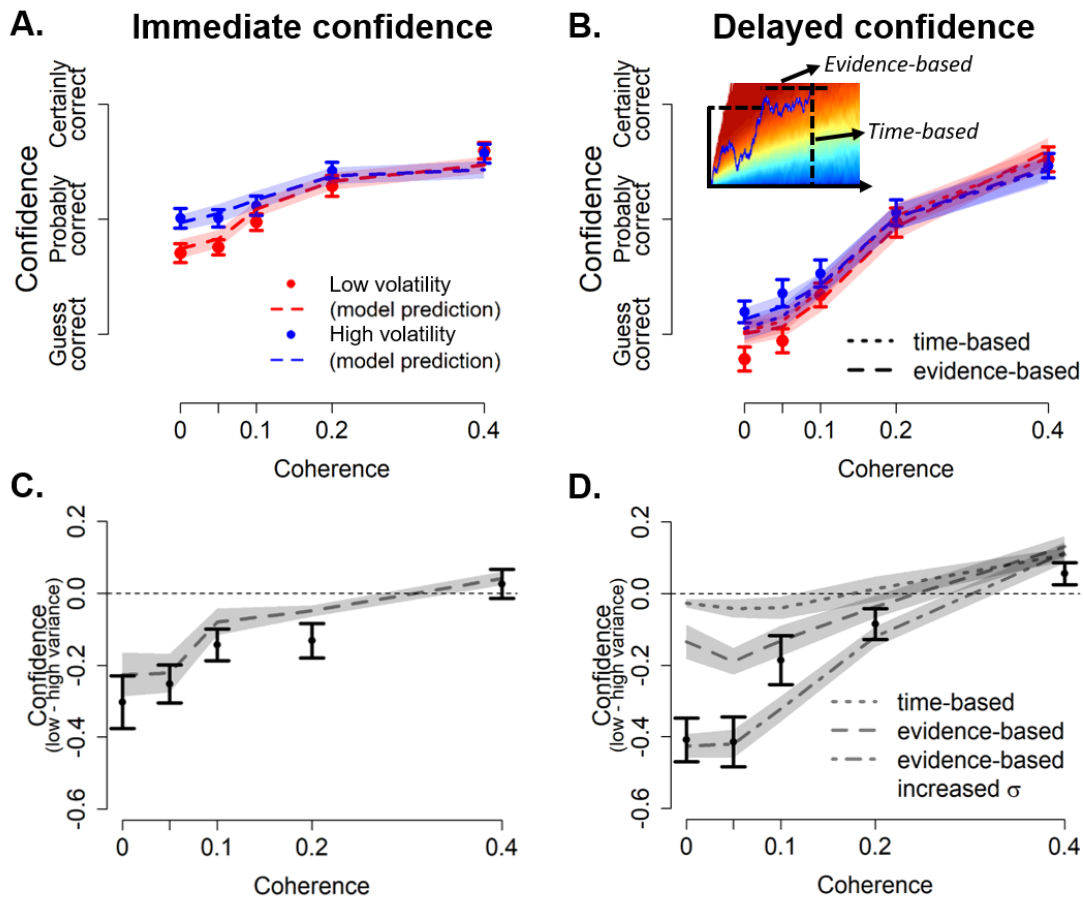

269

270 **Figure 5. Within-trial evidence volatility arbitrates between an evidence-based and a time-based**  
 271 **stopping rule.** Immediate confidence (A and C) and delayed confidence (B and D) as a function of  
 272 coherence and evidence volatility, separately for the empirical data (points and bars) and model  
 273 predictions (lines and shades). A and B show average confidence, C and D show differences between  
 274 low and high evidence volatility. The inset on the top right shows two potential stopping criteria for  
 275 post-decision processing: post-decision accumulation can stop after a fixed period of time (i.e., a  
 276 vertical time-based rule) or when a fixed amount of evidence is reached (i.e., a horizontal evidence-  
 277 based rule). Notes: shades and error bars reflect SEM of model and data, respectively.

278

279 For immediate confidence reports, model predictions closely capture the pattern seen  
 280 in human confidence ratings (see Figure 5A). Confidence monotonically increased with  
 281 coherence levels (data:  $F(4,22) = 27.47, p < .001$ ; model:  $F(4,22) = 27.68, p < .001$ ), and was  
 282 higher with high evidence volatility (data:  $F(1,25) = 41.19, p < .001$ ; model:  $F(1,25) = 9.90, p$

283 = .004). Similar to RTs, the effect of evidence volatility on confidence was most pronounced  
284 with low coherence values (data:  $F(4,22) = 4.46, p = .008$ ; model:  $F(4,22) = 30.79, p < .001$ ).  
285 To easily interpret this effect, Figure 5C shows differences between the low and high volatility  
286 condition. As can be seen, for both model and data, confidence was increased with high  
287 evidence volatility, particularly with low coherence values.

288 For *delayed confidence* reports, the data favored the evidence-based stopping rule  
289 over the time-based stopping rule (see Figure 5B and 6D). The data and both models  
290 showed a monotonic increase of confidence with coherence levels (data extra evidence:  
291  $F(4,22) = 46.67, p < .001$ ; data blank:  $F(4,22) = 33.38, p < .001$ ; time-based model:  $F(4,22) =$   
292  $60.83, p < .001$ ; evidence-based model:  $F(4,22) = 46.03, p < .001$ ), and an interaction  
293 between coherence and volatility (data extra evidence:  $F(4,22) = 10.39, p < .001$ ; data blank:  
294  $F(4,22) = 8.42, p < .001$ ; time-based model:  $F(4,22) = 11.94, p < .001$ ; evidence-based  
295 model:  $F(4,22) = 23.50, p < .001$ ). However, evidence volatility affected confidence in the  
296 data and the model with the evidence-based stopping rule (extra evidence:  $F(1,25) = 23.78,$   
297  $p < .001$ ; blank:  $F(1,25) = 28.69, p < .001$ ; evidence-based rule,  $F(1,25) = 8.96, p = .006$ ), but  
298 not with the time-based stopping rule,  $F < 1$ . Finally, in the human data, delayed confidence  
299 reports were similar irrespective of whether post-decision evidence or a blank screen was  
300 presented following the choice (data not shown). This was further confirmed by an analysis  
301 including post-decision evidence (extra evidence or blank), which did not show a three-way  
302 interaction,  $F < 1, BF = .037$ .

303 Figure 5D suggests that the effect of volatility on confidence for the lowest coherence  
304 values is even stronger than predicted by the model with the evidence-based stopping rule.  
305 This is most likely because the sigma parameter, which captures evidence volatility, was  
306 estimated based on choices and RTs only (i.e., not based on confidence). Therefore, our  
307 predictions about immediate and delayed confidence are entirely constrained by the decision  
308 process itself. Some evidence hints at the possibility that post-decision accumulation is  
309 different from pre-decision accumulation<sup>16</sup>. In the current context, it could therefore be that

310 post-decision processing from memory amplifies noise in the sampling process. Indeed,  
311 when simulating the model with an evidence-based stopping rule using a slightly increased  
312 sigma value in the high volatility condition ( $\sigma = .575$ ), it captures the pattern in the data even  
313 more tightly (see Figure 5D). This finding is in line with the possibility that post-decision  
314 accumulation is not fully determined by the pre-decision choice process.



315

## Discussion

316

317

318

319

320

321

322

323

324

325

326

327

### **Dynamic signatures of statistical confidence**

328

329

330

331

332

333

334

335

336

337

338

339

340

And influential framework conceptualizes the sense of confidence in a decision as the probability of a choice being correct. Although this formalization is principled and fruitful, it has remained unclear whether and how it can account for dynamic expressions of confidence. To close this gap, we have formalized confidence within an evidence accumulation framework as the probability of being correct, given the accumulated evidence up until that point. We tested model predictions concerning three diagnostic signatures of statistical confidence, most notably an interaction between evidence strength and choice accuracy, both for immediate and delayed confidence reports. There was a close correspondence between model and human data for all three signatures, showing that these signature of statistical confidence depend on the time at which confidence is queried.

Statistical models have conceptualized confidence as the probability of being correct<sup>4,5,22</sup>. Intuitively, when option A has a high (vs low) probability of being the correct answer, the model will give response A with high (vs low) confidence. One advantage of such a formalization is that it predicts the 3 qualitative signatures of confidence<sup>4</sup>. A limitation of such an account is that this framework is inherently static, and therefore does not take time into account. To resolve this, we relied instead on a dynamic evidence accumulation framework to probe these different signatures across time. We are not the first to account for confidence within an evidence accumulation framework<sup>14,17,18,23,24</sup>. Previous work has conceptualized immediate confidence as the probability of being correct given evidence and elapsed time<sup>14,15,23</sup>. Choices are formed when evidence reaches a fixed decision threshold, and both choice and confidence are quantified when this threshold is reached. This model is similar to ours, but it did not consider post-decision accumulation. As shown in our simulations, such a model does not predict an interaction between evidence strength and choice accuracy, a

341 prediction at odds with many existing datasets. By quantifying confidence across time, our  
342 model can account for these discrepancies. Specifically, our model was able to explain  
343 signature 1, an interaction between evidence strength and choice accuracy, in the immediate  
344 condition, as seen in behavioral data, by assuming that immediate confidence is quantified  
345 with a small temporal delay from the choice, suggesting a brief refractory period<sup>20,21</sup>. Thus,  
346 an important novel insight of the current work is that some form of post-decision evidence  
347 accumulation is necessary, even to explain immediate confidence reports.

348         Previous modelling work has unraveled boundary conditions of this first diagnostic  
349 signature, the interaction between evidence strength and choice accuracy. Model simulations  
350 have shown that this interaction disappears if stimuli are only probabilistically related to  
351 choices<sup>25</sup>, and if the statistical model has knowledge about evidence strength on the single-  
352 trial level<sup>26</sup>. Remarkably, however, no previous work has unraveled the role of time in this  
353 signature. The current work overcomes this limitation, by incorporating the notion of  
354 confidence reflecting the probability of being correct within a dynamic evidence accumulation  
355 framework. Our model simulations show that at the time of the boundary crossing,  
356 confidence increases with evidence strength for both corrects and errors, whereas the  
357 interaction effect only emerges with time. Crucially, this pattern was also observed in the  
358 empirical data. This has important consequences for studies relying on this signature to  
359 identify brain regions coding for decision confidence<sup>5,27</sup>.

360

### 361 **Post-decision processing terminates using an evidence-based stopping rule**

362 Post-decision evidence accumulation has been proposed as a mechanism explaining  
363 confidence<sup>17,18</sup> and biases in confidence judgments<sup>28</sup>. It remains unclear, however, which  
364 stopping rule terminates this process of post-decision accumulation. Our data favored an  
365 evidence-based stopping rule (i.e., the sampling process terminates when a certain level of  
366 evidence has been reached), while it was incompatible with a time-based stopping rule (i.e.,

367 sampling terminates after a certain time has elapsed). Only the evidence-based rule could  
368 explain increased confidence with high evidence volatility. Intuitively, high evidence volatility  
369 increases (immediate) confidence because the injection of noise in the decision process  
370 speeds up RTs <sup>14</sup>, and faster RTs are associated with higher confidence. The model with an  
371 evidence-based stopping rule for delayed confidence judgments similarly predicts higher  
372 confidence with high evidence volatility, because the noise again pushes the decision  
373 variable towards a certain level of evidence (i.e., a second bound). This effect does not  
374 appear with a time-based stopping rule, however, because the noise only affects the  
375 evidence (i.e., how fast is a certain level of evidence reached), but not the timing of post-  
376 decision accumulation itself. Therefore, using a time-based stopping rule the effects of  
377 evidence volatility are averaged out, and no differences in confidence are predicted. In sum,  
378 a second important insight of the current work is that human participants also use an  
379 evidence-based stopping rule in delayed confidence judgments.

380

### 381 **Sources of post-decisional evidence accumulation**

382 The hypothesis that confidence is affected by post-decisional evidence accumulation has  
383 evoked a strong interest in neural signatures of post-decisional processing <sup>9,16,29</sup>. For  
384 example, recent neuroimaging work has linked this process of post-decision evidence  
385 accumulation to a specific neural signal in the EEG <sup>29</sup>, that is sensitive to fine-grained levels  
386 of decision confidence <sup>1,30</sup>. One question that has been largely overlooked so far, is what kind  
387 of information determines post-decisional evidence accumulation. For example, external  
388 information could drive post-decisional evidence accumulation <sup>9</sup>. Alternatively, internal  
389 sources, such as additional evidence from the sensory buffer <sup>12</sup> or resampling from memory  
390 <sup>31</sup>, could determine such accumulation. To contrast these two possibilities, the current work  
391 featured conditions with and without additional external evidence during the post-decisional  
392 period. Interestingly, confidence judgments were highly similar between these two conditions.  
393 This demonstrates that, at least in our current experimental design, participant benefit

394 exclusively from internal resampling of the earlier evidence, whereas continued external  
395 sampling has no measurable influence. This does not imply that post-decisional evidence will  
396 never play a role in confidence. For example, in a recent study that de-correlated the  
397 strength of pre-decisional and post-decisional evidence (i.e., so that sometimes post-decision  
398 evidence was highly informative when pre-decision evidence was not), external post-  
399 decisional evidence did have a reliable effect on confidence<sup>9</sup>. Presumably, the correlational  
400 structure of post- versus pre-decision evidence determines whether sampling continues or  
401 not.

402

### 403 **Conclusion**

404 The current work quantified confidence within an evidence accumulation framework as the  
405 probability of being correct given the accumulated evidence up until that point. Both model  
406 and data showed that three key signatures of statistical confidence depend on the point in  
407 time when confidence is queried. Finally, post-decision confidence reports were best  
408 explained by an evidence-based stopping rule.

409

### **Acknowledgments**

410 The authors want to thank Peter R Murphy for advice on the modeling and Niklas  
411 Wilming, Cristian Buc Calderon and Konstantinos Tsetsos for fruitful discussions. This  
412 research was supported by an FWO [PEGASUS]<sup>2</sup> Marie Skłodowska-Curie fellowship  
413 (12T9717N, to K.D.), DFG grants DO 1240/2-1 and DO 1240/3-1 (to T.H.D.), and a  
414 Research Council-Flanders grant G010419N (to K.D and T.V.).

415

416

## Methods

### 417 **Participants**

418 Thirty participants (two men; age:  $M = 18.5$ ,  $SD = .78$ , range 18 – 21) took part in return for  
419 course credit. All participants reported normal or corrected-to-normal vision and were naïve  
420 with respect to the hypothesis. All but four participants were right handed. Four participants  
421 were excluded because their performance was not different from chance level in the  
422 immediate condition (as assessed by a binomial test). Participants provided written informed  
423 consent before participation. All data have been made publicly available via the Open  
424 Science Framework and can be accessed at [osf.io/83x7c](https://osf.io/83x7c). Non-overlapping analyses of  
425 these data have been published elsewhere <sup>3</sup>.

426

### 427 **Stimuli and apparatus**

428 Stimuli were presented in white on a black background on a 20-inch LCD monitor with a 75  
429 Hz refresh rate, using Psychtoolbox3 <sup>32</sup> for MATLAB (The MathWorks, Natick, MA). Random  
430 moving white dots were drawn in a circular aperture centered on the fixation point. The  
431 current experiment was based on code provided by Kiani and colleagues <sup>33</sup>. Parameter  
432 details can be found there.

433

### 434 **Procedure**

435 Participants completed a random dot motion task in which they additionally rated the  
436 confidence in their response. Each experimental trial started with a fixation dot for 750ms  
437 followed by random dot motion that lasted until a response was made, with a maximum of 3  
438 seconds. On each trial, the proportion of coherently moving dots was either 0, .05, .1, .2 or  
439 .4. In each block, there was an equal number of leftward and rightward movement. In the low  
440 evidence volatility condition, this proportion was the same on every timeframe within a trial.

441 In the high evidence volatility condition, the proportion of coherently moving dots was on  
442 each timeframe sampled from a Gaussian distribution with mean equal to the generative  
443 distribution of that trial and a standard deviation of .256. There were three different  
444 interrogation conditions. In the *immediate* condition, participants jointly indicated their  
445 response and their level of confidence. The numerical keys '1', '2', '3', '8', '9', and '0' on top  
446 of the keyboard mapped onto 'sure left', 'probably left', 'guess left', 'guess right', 'probably  
447 right', and 'sure right', respectively. In the *delayed blank* condition, participants indicated their  
448 response (left or right) by pressing 'c' or 'n' with the thumbs of their right and left hand,  
449 respectively. Then, a blank screen was presented for 1s, after which the following six  
450 confidence options were presented on the screen: 'sure correct', 'probably correct', 'guess  
451 correct', 'guess error', 'probably error', 'sure error' (reversed order for half of the participants).  
452 Participants had unlimited time to indicate their level of confidence by pressing one of the  
453 corresponding numerical keys (i.e., '1', '2', '3', '8', '9', and '0') on top of the keyboard. The  
454 *delayed extra evidence* condition was similar to the delayed blank condition, except that now  
455 1s of continued random motion was presented during the 1s interval between the response  
456 and the confidence judgment. The continued motion had the same direction, the same  
457 motion coherence and the same level of evidence volatility as the pre-decisional motion.

458 The entire experiment comprised twelve blocks of sixty trials each, including three  
459 practice blocks. In the first practice block, participants only indicated the direction of the dots  
460 (i.e., no confidence), and each trial stopped after a response was given. Only coherence  
461 levels of .2 and .4 were presented. When participants made an error, the message 'Error'  
462 was shown on the screen for 750ms. This block was repeated until mean accuracy exceeded  
463 75%. The second practice block was similar, except that now the full range of coherence  
464 levels was used. This block was repeated until mean accuracy exceeded 60%. Block three  
465 served as a last practice block, and was identical to the main experiment. No more feedback  
466 was presented from this block on. Each participant then performed three blocks of each  
467 interrogation condition, with the specific order depending on a Latin square. Before the start

468 of block seven and block ten (i.e., start of a new interrogation condition), participants  
469 performed eight practice trials with .4 coherence using the procedure of the subsequent  
470 block, to get familiarized with the response keys. These eight trials were repeated until  
471 accuracy exceeded 75%. After each block, participants received feedback about their  
472 performance in that block, including mean response time on correct trials, mean accuracy,  
473 and the absolute value of the correlation between accuracy and confidence. Participants  
474 were motivated to maximize these three values.

475

## 476 **Data analysis**

477 Behavioral data and model predictions were analyzed using mixed regression modeling. This  
478 method allows analyzing data at the single-trial level. We fitted random intercepts for each  
479 participant; error variance caused by between-subject differences was accounted for by  
480 adding random slopes to the model. The latter was done only when this significantly  
481 increased the model fit. RTs and confidence were analyzed using linear mixed models, for  
482 which  $F$  statistics are reported and the degrees of freedom were estimated by Satterthwaite's  
483 approximation<sup>34</sup>. Accuracy was analyzed using logistic linear mixed models, for which  $X^2$   
484 statistics are reported. Model fitting was done in R (R Development Core Team, 2008) using  
485 the lme4 package<sup>35</sup>.

486

## 487 **Drift diffusion modelling**

488 *Fitting.* Drift diffusion model parameters were estimated using hierarchical Bayesian  
489 estimation within the HDDM toolbox<sup>19</sup>. The HDDM uses Markov-chain Monte Carlo (MCMC)  
490 sampling, which generates full posterior distributions over parameter estimates, quantifying  
491 not only the most likely parameter value but also uncertainty associated with each estimate.  
492 Due to the hierarchical nature of the HDDM, estimates for individual subjects are constrained  
493 by group-level prior distributions. In practice, this results in more stable estimates for  
494 individual subjects. For each model, we drew 100.000 samples from the posterior

495 distribution. The first ten percent of these samples were discarded as burn-in and every  
496 second sample was discarded for thinning, reducing autocorrelation in the chains. Group  
497 level chains were visually inspected to ensure convergence, i.e. ruling out sudden jumps in  
498 the posterior and ruling out autocorrelation. Additionally, all models were fitted three times, in  
499 order to compute the Gelman-Rubin  $R$  hat statistics (comparing within-chain and between-  
500 chain variance). We checked and confirmed that all group-level parameters had an  $R$  hat  
501 between 0.98-1.02, showing convergence between these three instantiations of the same  
502 model. Because individual parameter estimates are constrained by group-level priors,  
503 frequentist statistics cannot be used because data are not independent. The probability that  
504 a condition differs from another can be computed by calculating the overlap in posterior  
505 distributions.

506         When fitting the data (choices and reaction times), both drift rate ( $v$ ) and decision  
507 bound ( $a$ ) were allowed to vary as a function of coherence and evidence volatility, whereas  
508 non-decision time ( $ter$ ) was fixed across conditions. According to our hypothesis, the effect of  
509 evidence volatility will be expressed in the within-trial variability parameter ( $\sigma$ ). When fitting  
510 the DDM this parameter is fixed (i.e., to .1 in the Ratcliff Diffusion model or to 1 in the  
511 currently used HDDM). Because  $\sigma$  is a scaling factor, after fitting the model, we next scaled  
512 drift rate, decision bound and within-trial variability for each condition so that decision bound  
513 was equal to 1. Thus, this is approach allows estimating within-trial variability. Note that  
514 under this approach, an implicit assumption is that the decision bound does not differ  
515 between the different conditions.

516         *Simulations.* Using the estimates obtained from the HDDM fit, predictions were  
517 generated using a random walk approximation of the diffusion process<sup>36</sup>. This method  
518 simulates a random walk process that starts at  $z \cdot a$  (here,  $z$  was an unbiased starting point of  
519 .5) and stops once the integrated evidence crosses 0 or  $a$ . At each time interval  $t$ , a  
520 displacement  $\Delta$  occurs with probability  $p$  and a displacement  $-\Delta$  with probability  $1-p$ . Both  
521 quantities are given in equation (1).



$$p = \frac{1}{2} \left( 1 + \frac{\mu\sqrt{\tau}}{\sigma} \right) \quad (1)$$

$$\Delta = \sigma\sqrt{\tau}$$

522 Drift rate is given by  $\mu$ , and within-trial variability is given by  $\sigma$ . In all simulations  $\tau$  was  
523 set to 1e-4. In order to construct the heat map representing the probability of being correct  
524 shown in Figure 1, 300,000 random walks without absorbing bounds were generated, with  
525 drift rates sampled from a uniform distribution between zero and one. This assured sufficient  
526 data points across the relevant part of the heat map. Subsequently, the average accuracy  
527 was calculated for each (response time, evidence) combination, based on all trials that had a  
528 data point for that (response time, evidence) combination. Smoothing was achieved by  
529 aggregating over evidence windows of .01 and  $\tau$  windows of 2.

530 To generate model fits for choices and RTs and model predictions for confidence, we  
531 used the parameters obtained by the HDDM fit. For each combination of coherence levels,  
532 within-trial evidence volatility and interrogation condition, we simulated 5000 trials per  
533 participant. Both immediate and delayed confidence predictions were obtained by reading  
534 out the probability of being correct from the heat map given RT and evidence, conditional on  
535 the response given. Model predictions about confidence were then converted from a  
536 continuous scale to a categorical scaling by dividing them into three (immediate condition) or  
537 six (delayed condition) equal-sized bins. For the immediate condition, confidence predictions  
538 were obtained without any post-decision accumulation. In the adapted version confidence  
539 was quantified with a small temporal delay of .1s; other (small) values led to very similar  
540 results. For delayed confidence predictions with a time-based stopping rule, after reaching  
541 the decision bound, the random walk process continued for one second (i.e., the duration of  
542 the ITI) plus the average response speed of confidence judgments in that condition minus  
543 the non-decision time of that condition. For the evidence-based stopping rule, after the  
544 evidence crosses  $a$ , an evidence-based stopping rule (i.e., a horizontal boundary) was  
545 placed at  $a + a^*.125$  and 0 (or similarly at  $-a^*.125$  and  $a$  if evidence initially crossed 0), and

546 confidence was quantified at the time when the continued evidence accumulation crossed  
547 this second-order threshold. To project model confidence onto the same scale as human  
548 confidence, we used a linear transformation.

549

## References

- 550 1. Desender, K., Murphy, P., Boldt, A., Verguts, T. & Yeung, N. A Postdecisional Neural  
551 Marker of Confidence Predicts Information-Seeking in Decision-Making. *J. Neurosci.*  
552 **39**, 3309–3319 (2019).
- 553 2. van den Berg, R., Zylberberg, A., Kiani, R., Shadlen, M. N. & Wolpert, D. M.  
554 Confidence Is the Bridge between Multi-stage Decisions. *Curr. Biol.* **26**, 3157–3168  
555 (2016).
- 556 3. Desender, K., Boldt, A., Verguts, T. & Donner, T. H. Confidence predicts speed-  
557 accuracy tradeoff for subsequent decisions. *Elife* **e43499**, 1:25 (2019).
- 558 4. Sanders, J. I., Hangya, B. & Kepecs, A. Signatures of a Statistical Computation in the  
559 Human Sense of Confidence. *Neuron* **90**, 499–506 (2016).
- 560 5. Kepecs, A., Uchida, N., Zariwala, H. a & Mainen, Z. F. Neural correlates, computation  
561 and behavioural impact of decision confidence. *Nature* **455**, 227–31 (2008).
- 562 6. Pouget, A., Drugowitsch, J. & Kepecs, A. Confidence and certainty: distinct  
563 probabilistic quantities for different goals. *Nat. Neurosci.* **19**, 366–374 (2016).
- 564 7. Urai, A. E., Braun, A. & Donner, T. H. Pupil-linked arousal is driven by decision  
565 uncertainty and alters serial choice bias. *Nat. Commun.* **8**, 1–11 (2017).
- 566 8. Braun, A., Urai, A. E. & Donner, T. H. Adaptive history biases result from confidence-  
567 weighted accumulation of past choices. *J. Neurosci.* **38**, 2418–2429 (2018).
- 568 9. Fleming, S. M., van der Putten, E. J. & Daw, N. D. Neural mediators of changes of  
569 mind about perceptual decisions. *Nat. Neurosci.* (2018). doi:10.1038/s41593-018-  
570 0104-6
- 571 10. Gold, J. I. & Shadlen, M. N. The neural basis of decision making. *Annu. Rev.*  
572 *Neurosci.* **30**, 535–561 (2007).
- 573 11. Ratcliff, R. & McKoon, G. The Diffusion Decision Model : Theory and Data for Two-  
574 Choice Decision Tasks. *Neural Comput.* **20**, 873–922 (2008).
- 575 12. Resulaj, A., Kiani, R., Wolpert, D. M. & Shadlen, M. N. Changes of mind in decision-  
576 making. *Nature* **461**, 263–266 (2009).
- 577 13. Calderon, C. B., Verguts, T. & Gevers, W. Losing the boundary: Cognition biases  
578 action well after action selection. *J. Exp. Psychol. Gen.* **144**, 737–743 (2015).
- 579 14. Zylberberg, A., Fetsch, C. R. & Shadlen, M. N. The influence of evidence volatility on  
580 choice , reaction time and confidence in a perceptual decision. *Elife* **5**, 1–31 (2016).
- 581 15. Kiani, R. & Shadlen, M. N. Representation of confidence associated with a decision by  
582 neurons in the parietal cortex. *Science (80- )*. **324**, 759–764 (2009).
- 583 16. Yu, S., Pleskac, T. J. & Zeigenfuse, M. D. Dynamics of Postdecisional Processing of  
584 Confidence. *J. Exp. Psychol. Gen.* **144**, 489–510 (2015).

- 585 17. Pleskac, T. J. & Busemeyer, J. R. Two-stage dynamic signal detection: A theory of  
586 choice, decision time, and confidence. *Psychol. Rev.* **117**, 864–901 (2010).
- 587 18. Moran, R., Teodorescu, A. R. & Usher, M. Post choice information integration as a  
588 causal determinant of confidence: Novel data and a computational account. *Cogn.*  
589 *Psychol.* **78**, 99–147 (2015).
- 590 19. Wiecki, T. V., Sofer, I. & Frank, M. J. HDDM: Hierarchical Bayesian estimation of the  
591 Drift-Diffusion Model in Python. *Front. Neuroinform.* **7**, 1–10 (2013).
- 592 20. Pashler, H. Dual-task interference in simple tasks: Data and theory. *Psychol. Bull.* **116**,  
593 220–244 (1994).
- 594 21. Marti, S., King, J.-R. & Dehaene, S. Time-Resolved Decoding of Two Processing  
595 Chains during Dual-Task Interference. *Neuron* 1–11 (2015).  
596 doi:10.1016/j.neuron.2015.10.040
- 597 22. Maniscalco, B. & Lau, H. A signal detection theoretic approach for estimating  
598 metacognitive sensitivity from confidence ratings. *Conscious. Cogn.* **21**, 422–30  
599 (2012).
- 600 23. Kiani, R., Corthell, L. & Shadlen, M. N. Choice Certainty Is Informed by Both Evidence  
601 and Decision Time. *Neuron* **84**, 1329–1342 (2014).
- 602 24. Ratcliff, R. & Starns, J. J. Modeling confidence judgments, response times, and  
603 multiple choices in decision making: recognition memory and motion discrimination.  
604 *Psychol. Rev.* **120**, 697–719 (2013).
- 605 25. Adler, W. T. & Ma, W. J. Limitations of Proposed Signatures of Bayesian Confidence.  
606 *Neural Comput.* **30**, 1–28 (2018).
- 607 26. Rausch, M. & Zehetleitner, M. The folded X-pattern is not necessarily a statistical  
608 signature of decision confidence. *PLoS Comput. Biol.* **15**, e1007456 (2019).
- 609 27. Kepecs, A. & Mainen, Z. F. A computational framework for the study of confidence in  
610 humans and animals. *Philos. Trans. R. Soc. Lond. B. Biol. Sci.* **367**, 1322–37 (2012).
- 611 28. Navajas, J., Bahrami, B. & Latham, P. E. Post-decisional accounts of biases in  
612 confidence. *Curr. Opin. Behav. Sci.* **11**, 55–60 (2016).
- 613 29. Murphy, P. R., Robertson, I. H., Harty, S. & O’Connell, R. G. Neural evidence  
614 accumulation persists after choice to inform metacognitive judgments. *Elife* **4**, 1–23  
615 (2015).
- 616 30. Boldt, A. & Yeung, N. Shared Neural Markers of Decision Confidence and Error  
617 Detection. *J. Neurosci.* **35**, 3478–3484 (2015).
- 618 31. Vlassova, A. & Pearson, J. Look Before You Leap: Sensory Memory Improves  
619 Decision Making. *Psychol. Sci.* **24**, 1635–1643 (2013).
- 620 32. Brainard, D. H. The Psychophysics Toolbox. *Spat. Vis.* **10**, 433–6 (1997).
- 621 33. Kiani, R., Churchland, A. K. & Shadlen, M. N. Integration of Direction Cues Is Invariant

- 622 to the Temporal Gap between Them. *J. Neurosci.* **33**, 16483–16489 (2013).
- 623 34. Kuznetsova, A., Brockhoff, P. B. & Christensen, R. H. B. lmerTest: Test in Linear  
624 Mixed Effect Models. R package version 2.0-20. [http://CRAN.R-](http://CRAN.R-project.org/package=lmerTest)  
625 [project.org/package=lmerTest](http://CRAN.R-project.org/package=lmerTest). (2014).
- 626 35. Bates, D. M., Maechler, M., Bolker, B. & Walker, S. Fitting Linear Mixed-Effects  
627 Models Using lme4. *J. Stat. Softw.* **67**, 1–48 (2015).
- 628 36. Tuerlinckx, F., Maris, E., Ratcliff, R. & De Boeck, P. A comparison of four methods for  
629 simulating the diffusion process. *Behav. Res. Methods, Instruments, Comput.* **33**,  
630 443–456 (2001).
- 631

## 632 **Supplementary Materials**

### 633 **Statistical confidence signatures with an evidence-based stopping rule.**

634 Model predictions about the statistical confidence signatures for the delayed condition were  
635 quantified using a time-based stopping rule. Here, we report that these predictions were  
636 highly similar when using an evidence-based stopping rule instead. First, this model also  
637 predicted that confidence scales with coherence,  $F(4,225) = 84.43$ ,  $p < .001$ , as well as the  
638 interaction between coherence and choice accuracy,  $F(4,225) = 232.31$ ,  $p < .001$ , reflecting  
639 increasing confidence with coherence levels for correct trials (linear contrast:  $p < .001$ ) and  
640 decreasing for error trials (linear contrast:  $p < .001$ ). Second, this model also predicted a  
641 monotonic positive relation between confidence and mean accuracy,  $b = .06$ ,  $t(129) = 20.42$ ,  
642  $p < .001$ .
